# Supplementary material for: Ectopic BASL Reveals Tissue Cell Polarity throughout Leaf Development in Arabidopsis thaliana
Source: PubMed Central journal article supplement (PMC6109230; doi:10.1016/j.cub.2018.06.019), 2018-08-20
Supplement: mmc2.pdf [file mmc2.pdf]

# Current Biology

## Ectopic BASL Reveals Tissue Cell Polarity throughout Leaf Development in *Arabidopsis thaliana*

### Graphical Abstract

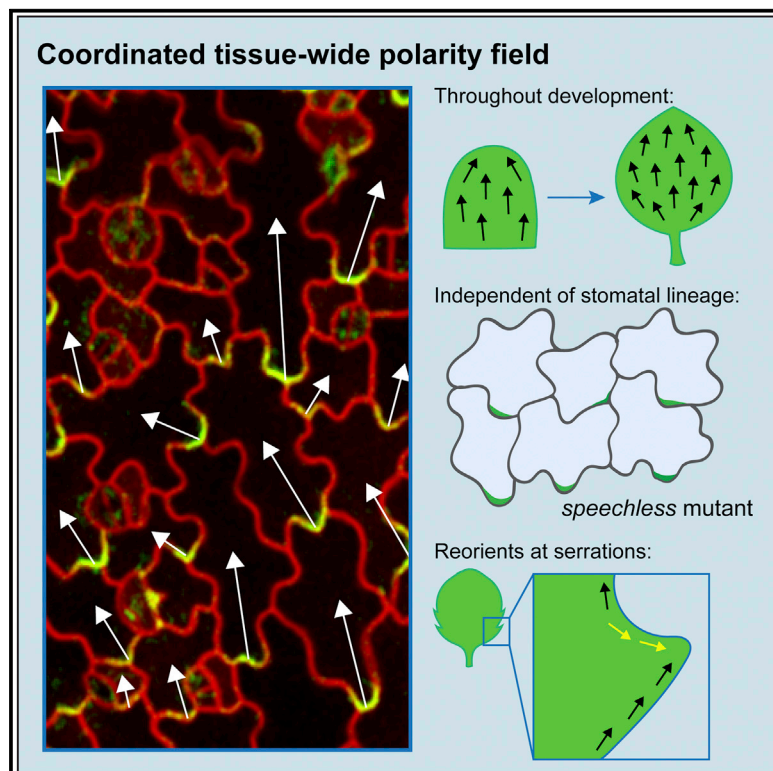

### Authors

Catherine Mansfield,  
Jacob L. Newman, Tjelvar S.G. Olsson,  
Matthew Hartley, Jordi Chan,  
Enrico Coen

### Correspondence

jordi.chan@jic.ac.uk (J.C.),  
enrico.coen@jic.ac.uk (E.C.)

### In Brief

Mansfield et al. demonstrate a coordinated tissue cell polarity field in the *Arabidopsis* leaf epidermis revealed by ectopic expression of BASL. This polarity field is independent of the stomatal lineage and reorients around serrations, mirroring the polarity of PIN1.

### Highlights

- Ectopic expression of BASL in *Arabidopsis* leaves reveals coordinated polarity
- The ectopic BASL polarity field is independent of the stomatal lineage
- The polarity field reorients around serrations, mirroring PIN1 polarity

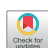

# Ectopic BASL Reveals Tissue Cell Polarity throughout Leaf Development in *Arabidopsis thaliana*

Catherine Mansfield,<sup>1</sup> Jacob L. Newman,<sup>1,2</sup> Tjelvar S.G. Olsson,<sup>1</sup> Matthew Hartley,<sup>1</sup> Jordi Chan,<sup>1,\*</sup> and Enrico Coen<sup>1,3,\*</sup>

<sup>1</sup>John Innes Centre, Colney Lane, Norwich NR4 7UH, UK

<sup>2</sup>Present address: School of Computing Sciences, University of East Anglia, Norwich NR4 7TJ, UK

<sup>3</sup>Lead Contact

\*Correspondence: [jordi.chan@jic.ac.uk](mailto:jordi.chan@jic.ac.uk) (J.C.), [enrico.coen@jic.ac.uk](mailto:enrico.coen@jic.ac.uk) (E.C.)

<https://doi.org/10.1016/j.cub.2018.06.019>

## SUMMARY

Tissue-wide polarity fields, in which cell polarity is coordinated across the tissue, have been described for planar organs such as the *Drosophila* wing and are considered important for coordinating growth and differentiation [1]. In planar plant organs, such as leaves, polarity fields have been identified for subgroups of cells, such as stomatal lineages [2], trichomes [3, 4], serrations [5], or early developmental stages [6]. Here, we show that ectopic induction of the stomatal protein BASL (BREAKING OF ASYMMETRY IN THE STOMATAL LINEAGE) reveals a tissue-wide epidermal polarity field in leaves throughout development. Ectopic GFP-BASL is typically localized toward the proximal end of cells and to one lobe of mature pavement cells, revealing a polarity field that aligns with the proximodistal axis of the leaf (base to tip). The polarity field is largely parallel to the midline of the leaf but diverges in more lateral positions, particularly at later stages in development, suggesting it may be deformed during growth. The polarity field is observed in the *speechless* mutant, showing that it is independent of stomatal lineages, and is observed in isotropic cells, showing that cell shape anisotropy is not required for orienting polarity. Ectopic BASL forms convergence and divergence points at serrations, mirroring epidermal PIN polarity patterns, suggesting a common underlying polarity mechanism. Thus, we show that similar to the situation in animals, planar plant organs have a tissue-wide cell polarity field, and this may provide a general cellular mechanism for guiding growth and differentiation.

## RESULTS AND DISCUSSION

### Ectopic BASL Reveals a Polarity Field Independent of Stomatal Lineages

Asymmetries across individual cells (cell polarity) can be coordinated across a tissue to give tissue-wide polarity fields [7]. Polar-

ity fields have been invoked to account for patterns of oriented growth of planar organs, such as leaves [8]. Mathematically, a polarity field corresponds to each position in space having a vector (a vector field) [9]. In biological terms, these positions may correspond to individual cells. However, evidence for a tissue-wide polarity field maintained during planar plant organ development has been lacking.

Several proteins preferentially localized to one end of the cell (i.e., exhibiting cell polarity) have been described in plants, including PIN-FORMED (PIN) proteins, BASL (BREAKING OF ASYMMETRY IN THE STOMATAL LINEAGE), BRXL2 (BREVIS RADIX-LIKE 2), POLAR (POLAR LOCALIZATION DURING ASYMMETRIC DIVISION AND REDISTRIBUTION), OCTOPUS, BORs (BORON TRANSPORTERS 1), and NIPs (NODULIN26-LIKE INTRINSIC PROTEINS) [2, 10–14]. Some of these proteins, notably PIN1 and BRXL2, exhibit polarity coordination in the developing leaf epidermis. PIN1 is preferentially localized at the distal end of cells in leaf primordia, but this pattern disappears at later developmental stages [6, 15]. BRXL2 shows preferential localization to the proximal end of cells in the stomatal lineage [2], compounded by a spiral pattern of polarity switching involved in stomatal spacing [16].

Here, we use BASL to explore polarity patterns in developing leaves. BASL has a well-characterized polarity pattern that is similar to BRXL2, localizing to a crescent in stomatal lineage cells [2] [16]. Localized BASL domains have also been described in root cells ectopically expressing BASL [11].

To see if a polarity field could exist across the leaf independently of the stomatal pathway, we exploited the *speechless* (*spch*) mutant, which lacks stomatal lineages. We induced expression of *35S::GFP-BASL* using a heat-shock-inducible Cre-lox system [17] to avoid potentially pleiotropic effects of overexpressing BASL throughout development [11].

Ectopically induced BASL was asymmetrically localized in leaf epidermal cells of *spch* (Figure 1A). Signal typically spanned cell vertices (three-way junctions, Figure S1F), allowing assignment to individual cells. In pavement cells, signal was typically observed in a single lobe, toward the proximal end of the cell. To quantify the polarity pattern, we assigned cell unit vectors that pointed from the midpoint of the BASL crescent signal to the cell centroid (Figure 1B). To avoid subjective bias, we randomly rotated automatically segmented single cells before BASL signal was manually identified (Figures S1G–S1O). Processed cells were then returned to their original position and

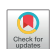

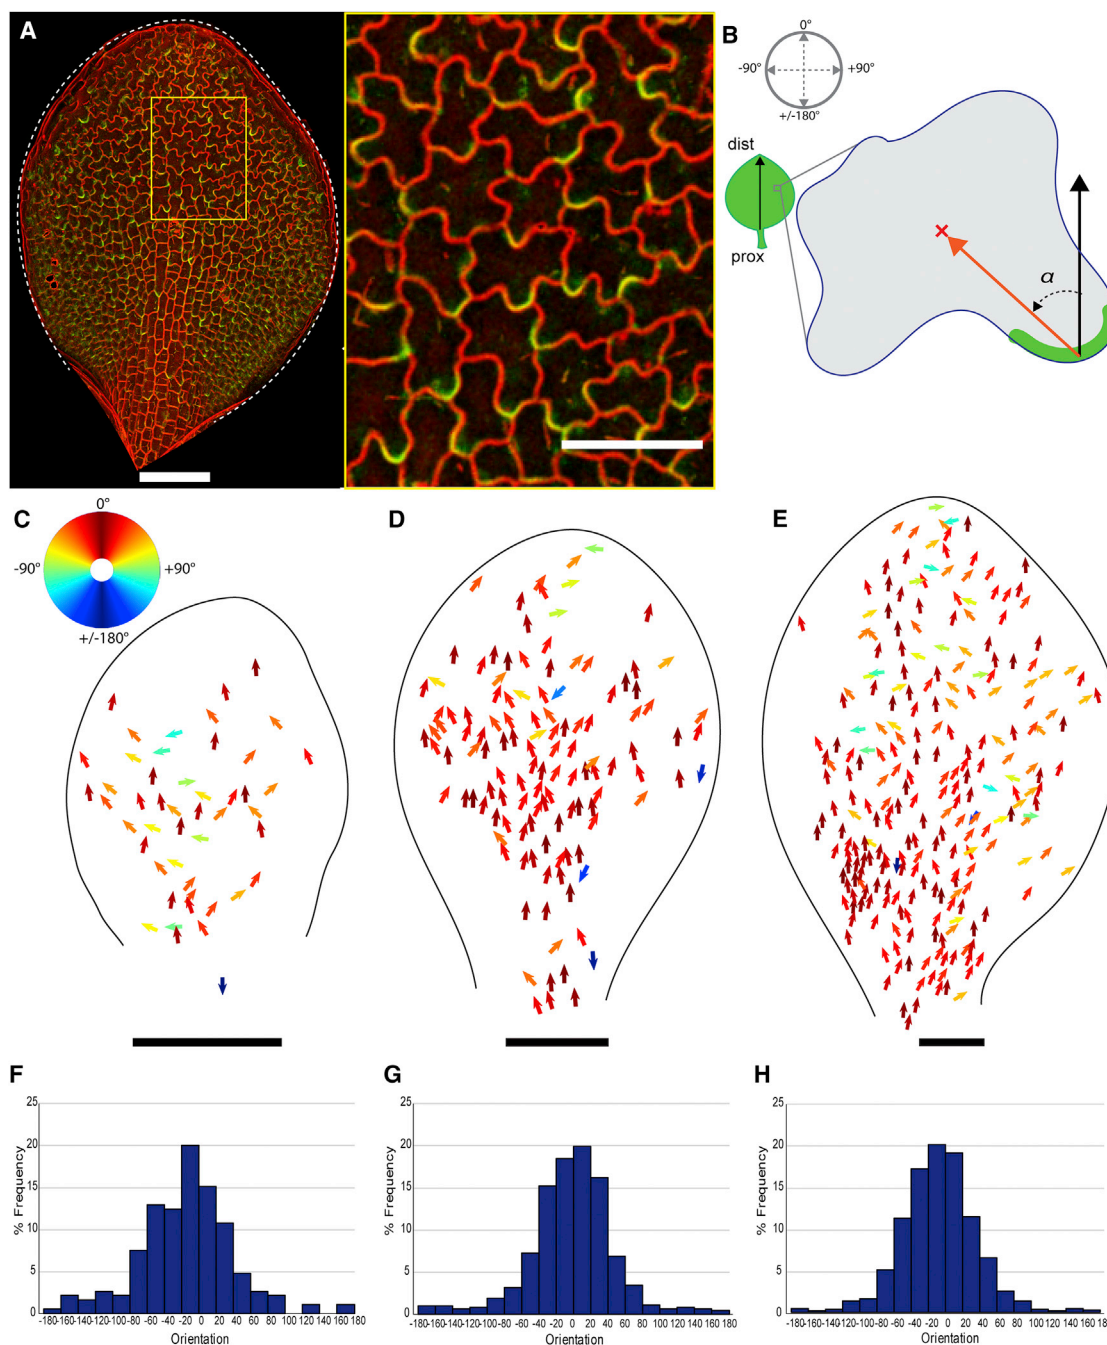

### Figure 1. Ectopic BASL Reveals a Polarity Field Independent of Stomatal Lineages

(A) Induced *35S::GFP-BASL* in *speechless* leaf stained with propidium iodide (PI). Scale bar is 50  $\mu\text{m}$  in right panel.

(B) BASL vectors (orange arrow) assigned from BASL crescent to cell centroid.  $\alpha$  between midline vector (black arrow) and BASL vector.

(C–E) Ectopic BASL vectors colored according to color wheel (in C) indicating  $\alpha$  orientation in *speechless* leaves of (C) 50–200  $\mu\text{m}$ , (D) 200–400  $\mu\text{m}$ , and (E) 400–800  $\mu\text{m}$  width categories. Leaf outlines shown.

(F–H) Vector orientation in *speechless* leaves pooled from widths (F) 50–200  $\mu\text{m}$  ( $n = 185$  cells, 4 leaves,  $\sigma = 55.34$ ), (G) 200–400  $\mu\text{m}$  ( $n = 1199$  cells, 12 leaves,  $\sigma = 49.43$ ), and (H) 400–800  $\mu\text{m}$  ( $n = 2063$  cells, 9 leaves,  $\sigma = 44.68$ ).  $0^\circ$  represents proximodistal vector. Scale bars are 100  $\mu\text{m}$  except for the right panel of (A). See also [Figure S1](#).

orientation. The BASL vector orientation was calculated with respect to the proximodistal midline vector of the leaf ([Figure 1B](#)) and plotted according to a color map ([Figure 1C](#)). We refer to the resulting vector field as the ectopic BASL polarity field.

At all developmental stages analyzed, BASL vectors were largely proximodistally oriented in *spch* (i.e., BASL localized toward the proximal end of cells; red/orange arrows in [Figures 1C–1E](#)). Some vectors deviated from this proximodistal pattern,

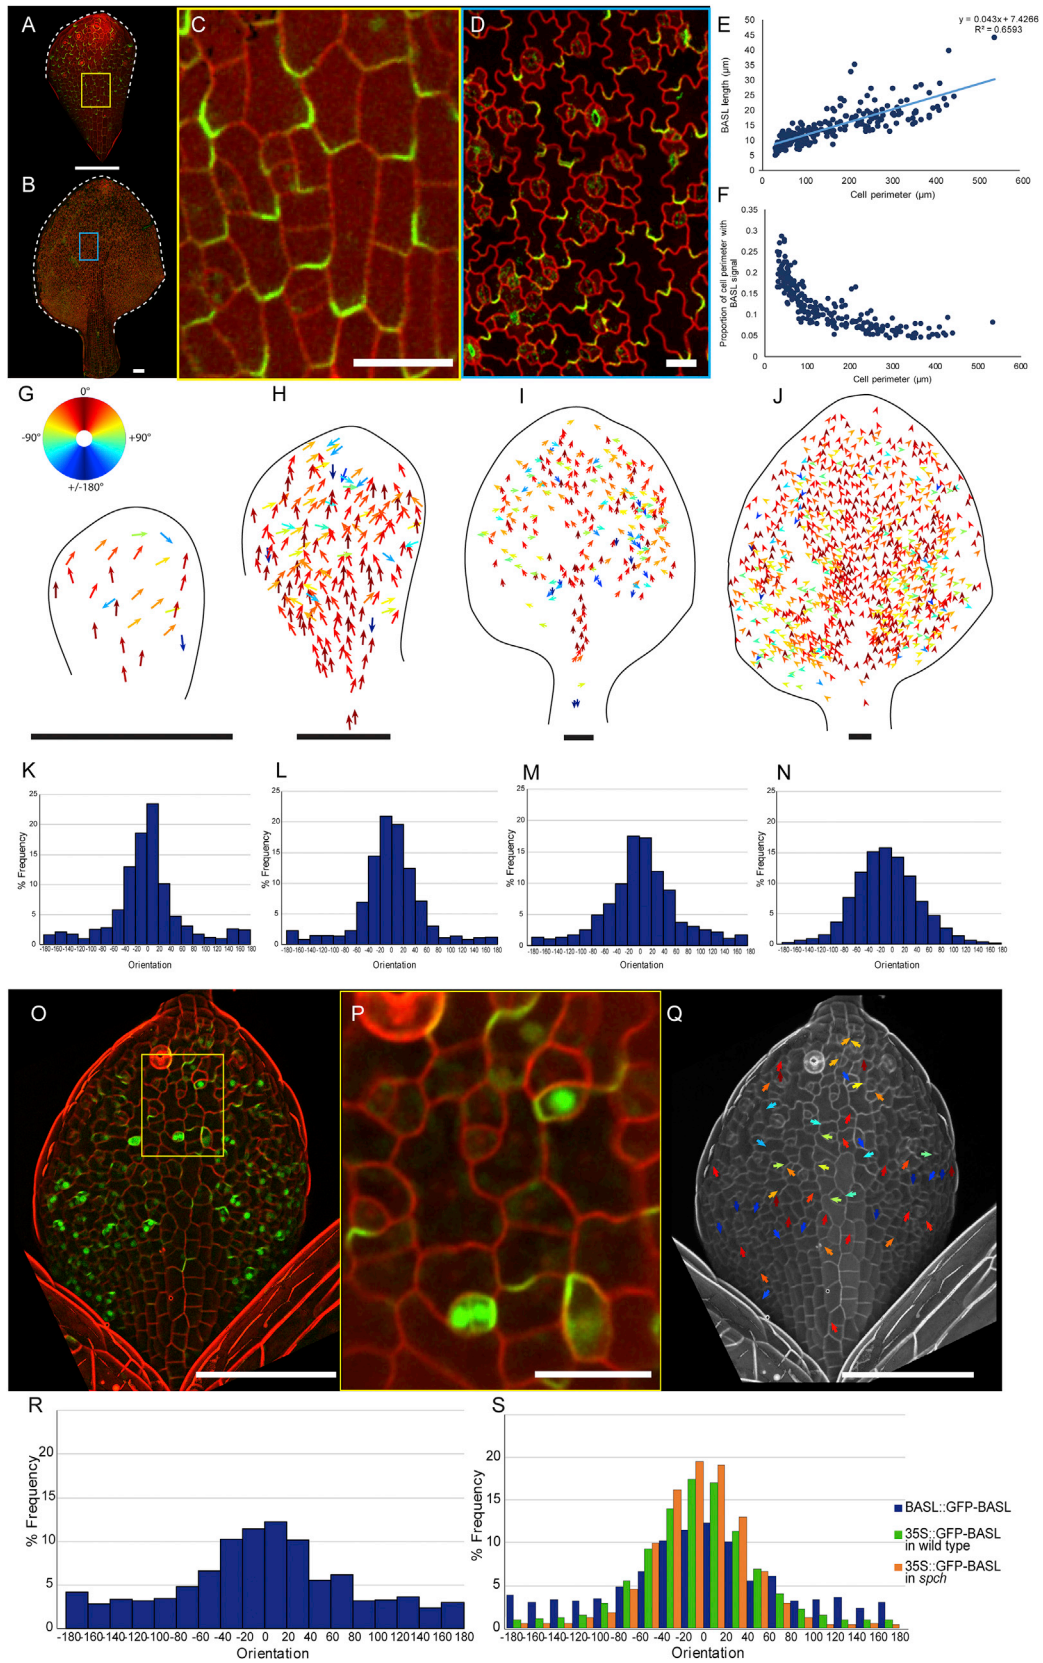

(legend on next page)

particularly toward the leaf tip, though very few vectors pointed proximally (Figures 1C–1E). BASL vector orientations from multiple *spch* leaves were pooled according to leaf size and plotted in histograms (Figures 1F–1H). More than 90% of the BASL vectors were within the range of  $-80^\circ$  to  $80^\circ$ . Thus, ectopic BASL reveals a strongly coordinated proximodistal polarity field across leaves of different sizes that is independent of stomatal lineages.

### The Polarity Field Revealed by Ectopic BASL Is Present in Wild-Type Leaves

Given that ectopic BASL reveals a proximodistal polarity field in *spch*, we might expect a similar field to be present in the non-stomatal lineage cells of wild-type leaves. To test this hypothesis, *35S::GFP-BASL* was induced in a wild-type background at different developmental stages (Figures 2A–2D). As in *spch*, ectopic BASL was predominantly observed at the proximal end of cells, often at cell corners (Figure 2C) or within single-pavement cell lobes (Figure 2D). These cells included those above the midvein, which do not develop stomatal lineages [18]. Proximal localization was confirmed from analysis of sectors of BASL expression (Figures S1A–S1E), and by polarity quantification (Figures 2G–2N).

BASL is not normally expressed outside stomatal lineage cells, suggesting that ectopic BASL expression either induces polarity or reveals a polarity field that does not itself depend on BASL function. If ectopic BASL induces polarity, we might expect signal to gradually coalesce on a proximal domain following induction. Time-lapse imaging leaves after heat-shock induction showed that, rather than coalescing, ectopic BASL appeared in its proximal location from approximately 12 hr after heat-shock induction and gradually intensified (Figure S2). This suggests that ectopic BASL does not itself induce cell polarity but rather marks a pre-existing polarity.

We hypothesize that ectopic BASL binds to interacting partners—for example, proteins or lipid domains—that are located proximally in each cell throughout development. We refer to these hypothetical interacting partners as providing a proximal molecular address. Localization of BASL to cell corners or to a single lobe of pavement cells may reflect a single address located at the proximal extrema of the cell. It is also possible that positioning of the proximal address is modulated by factors establishing lobe and neck formation [19–21] or located at cell corners.

The proximal address may be held at a fixed length or increase in length as the cell grows. To distinguish these possi-

bilities, we measured the length of the ectopic BASL domain at different developmental stages in a wild-type background. Domain length increased from  $\sim 5 \mu\text{m}$  to  $\sim 45 \mu\text{m}$  as cells increased in size, but at a rate lower than the rate of increase in cell perimeter (Figures 2E and 2F). This finding suggests that the proximal address does not have a fixed size but may be restricted through interactions with other factors in the cell, consistent with a model of polarity establishment involving intracellular partitioning [22].

The cytoskeleton has previously been associated with formation of cell polarity [23, 24]. To test if microtubules are required for positioning ectopic BASL, we destabilized microtubules with oryzalin before inducing BASL. In oryzalin-treated plants, ectopic BASL was still polarized (Figures S3A–S3G), suggesting that microtubules are not required for the polarization of BASL, similar to BRXL2 [2].

### Wild-Type Exhibits a Combination of Stomatal and Non-stomatal Polarity Fields

For a comparable stage, the proportion of BASL vectors outside the range of  $-80^\circ$  to  $80^\circ$  was significantly higher for wild-type than for *spch* (Table S1). To determine whether the lower level of proximodistal coordination in wild-type was caused by more variable BASL polarity orientation in stomatal lineage cells, we imaged leaves expressing *BASL::GFP-BASL* [11]. BASL was asymmetrically localized within individual cells, as well as expressed in the nucleus (Figures 2O and 2P), as previously described [11, 16]. Although not obvious from inspection of a single leaf (Figure 2Q), when multiple leaves were pooled, proximodistal coordination was observed for BASL vectors in *BASL::GFP-BASL* (Figure 2R), as reported for BRXL2 [2]. BASL polarity was significantly less coordinated than for ectopic BASL in *spch* (Table S1). Wild-type background showed an intermediate distribution (Figure 2S and Table S1), suggesting that it reflects a mixture of two patterns: a strongly coordinated proximodistal pattern in non-stomatal lineage cells and a weaker coordinated pattern in stomatal lineage cells.

Two hypotheses may account for the weaker polarity coordination of the stomatal lineage. One is that the proximodistal address becomes reoriented in stomatal lineage cells, and ectopic BASL follows this pattern. Alternatively, stomatal lineage cells contain two addresses (i.e., two regions with BASL-interacting factors) that compete for ectopic BASL: a proximal address and an address specific to stomatal lineages.

### Figure 2. Ectopic BASL in a Wild-Type Background and *BASL::GFP-BASL* Show Coordinated Patterns throughout Development

(A–D) Induced *35S::GFP-BASL* in (A) 50–200  $\mu\text{m}$  and (B) >800  $\mu\text{m}$  width leaves magnified in (C) and (D), respectively. Cell outlines shown using PI staining in C and RFP-PM in D.

(E) Length of BASL crescent against cell perimeter for leaves of various sizes.

(F) BASL crescent length as a proportion of cell perimeter.

(G–J) Ectopic BASL vectors colored according to color wheel (in G) in leaves of (G) 50–200  $\mu\text{m}$ , (H) 200–400  $\mu\text{m}$ , (I) 400–800  $\mu\text{m}$  and (J) 800+  $\mu\text{m}$  widths.

(K–N) Vector orientations pooled in leaves of (K) 50–200  $\mu\text{m}$  ( $n = 1042$  cells, 15 leaves,  $\sigma = 64.76$ ), (L) 200–400  $\mu\text{m}$  ( $n = 1464$  cells, 9 leaves,  $\sigma = 57.25$ ), (M) 400–800  $\mu\text{m}$  ( $n = 890$  cells, 4 leaves,  $\sigma = 63.67$ ), and (N) 800+  $\mu\text{m}$  ( $n = 3642$  cells, 4 leaves,  $\sigma = 52.71$ ) widths.

(O and P) (O) *BASL::GFP-BASL* leaf stained with PI and magnified in (P).

(Q) BASL vectors from leaf in (O) colored according to color wheel (shown in G).

(R) BASL vector orientations in *BASL::GFP-BASL* pooled from multiple leaves from 50–800  $\mu\text{m}$  width ( $n = 1319$  cells, 21 leaves,  $\sigma = 82.3$ ).

(S) Percentage frequency of BASL vector orientations for induced *35S::GFP-BASL* in WT and *speechless* background and *BASL::GFP-BASL*.

Each genotype pooled from at least 20 leaves from 50–800  $\mu\text{m}$ .  $p < 10^{-5}$  for each pairwise chi-squared comparison (Table S1). Scale bars are 100  $\mu\text{m}$  in (A), (B), (G)–(I), (O), and (Q) and 20  $\mu\text{m}$  in (C), (D), and (P). See also Figures S1 and S2.

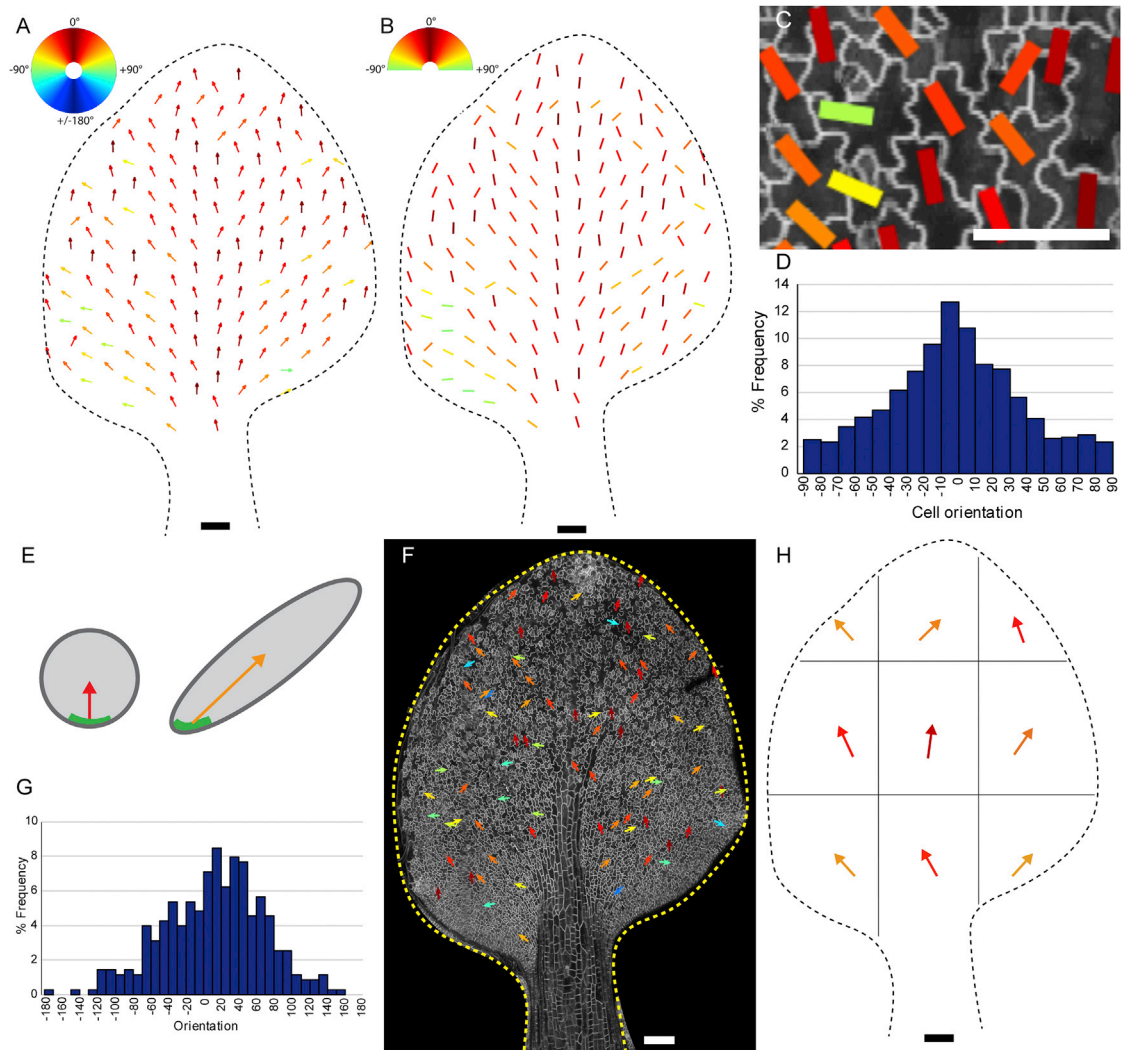

**Figure 3. Ectopic BASL Polarity in a Wild-Type Background Becomes Divergent during Development and Is Present in Near-Isotropic Cells**

(A) Downsampled vectors in leaf of  $>800\ \mu\text{m}$  width plotted according to color map.

(B) Downsampled cell long axes for leaf in (A) plotted according to color map. Due to the long axes being tensors and not vectors, half of the color map is used.

(C) Close-up of individual cell orientations for leaf in (B). Scale bar is  $20\ \mu\text{m}$ .

(D) Orientation of cell long axis relative to leaf midline vector for leaf shown in (A) and (B). See also [Figure S4](#).

(E) Schematic of an isotropic cell with BASL localized to the proximal end (left) and an anisotropic cell where BASL polarity vector has become deflected, even though BASL position is unchanged (right).

(F) Leaf in (A) with BASL vectors for cells with eccentricity  $<0.6$  plotted.

(G) BASL vector orientation for near-isotropic cells relative to leaf midline vector. Data pooled from 4 leaves of  $800+\ \mu\text{m}$  width.

(H) Leaf in (A) divided into regions with average BASL vector orientations in each section shown and plotted according to color map in (A) See also [Table S2](#).

Scale bars are  $100\ \mu\text{m}$  except in (C).

### The Polarity Field Becomes Divergent during Development

To visualize the ectopic BASL polarity pattern more easily, larger leaves were downsampled by averaging vector orientations using a grid ([Figure 3A](#)). This analysis showed that vectors in the midvein region were highly coordinated in a proximodistal orientation, while those in the proximal lamina diverged away from the midvein toward the margin ([Figure 3A](#)). The ectopic BASL polarity field shows striking similarities with a polarity field previously proposed to account for orientations of growth [8]. In both cases, the polarity field becomes divergent at later stages of develop-

ment. It has also been shown that the orientation of BRXL2 polarity is aligned with the orientation of subsequent growth [2]. These results suggest that polarity may provide orientation information to guide growth.

However, this interpretation is complicated because of the way polarity is assigned in relation to the centroid of the cell. For example, suppose BASL is proximal in a circular cell ([Figure 3E](#), left). If that cell becomes elongated diagonally (either through growth or diagonal division), polarity will also become diagonal, even though there has been no change in the positioning of the BASL signal ([Figure 3E](#), right).

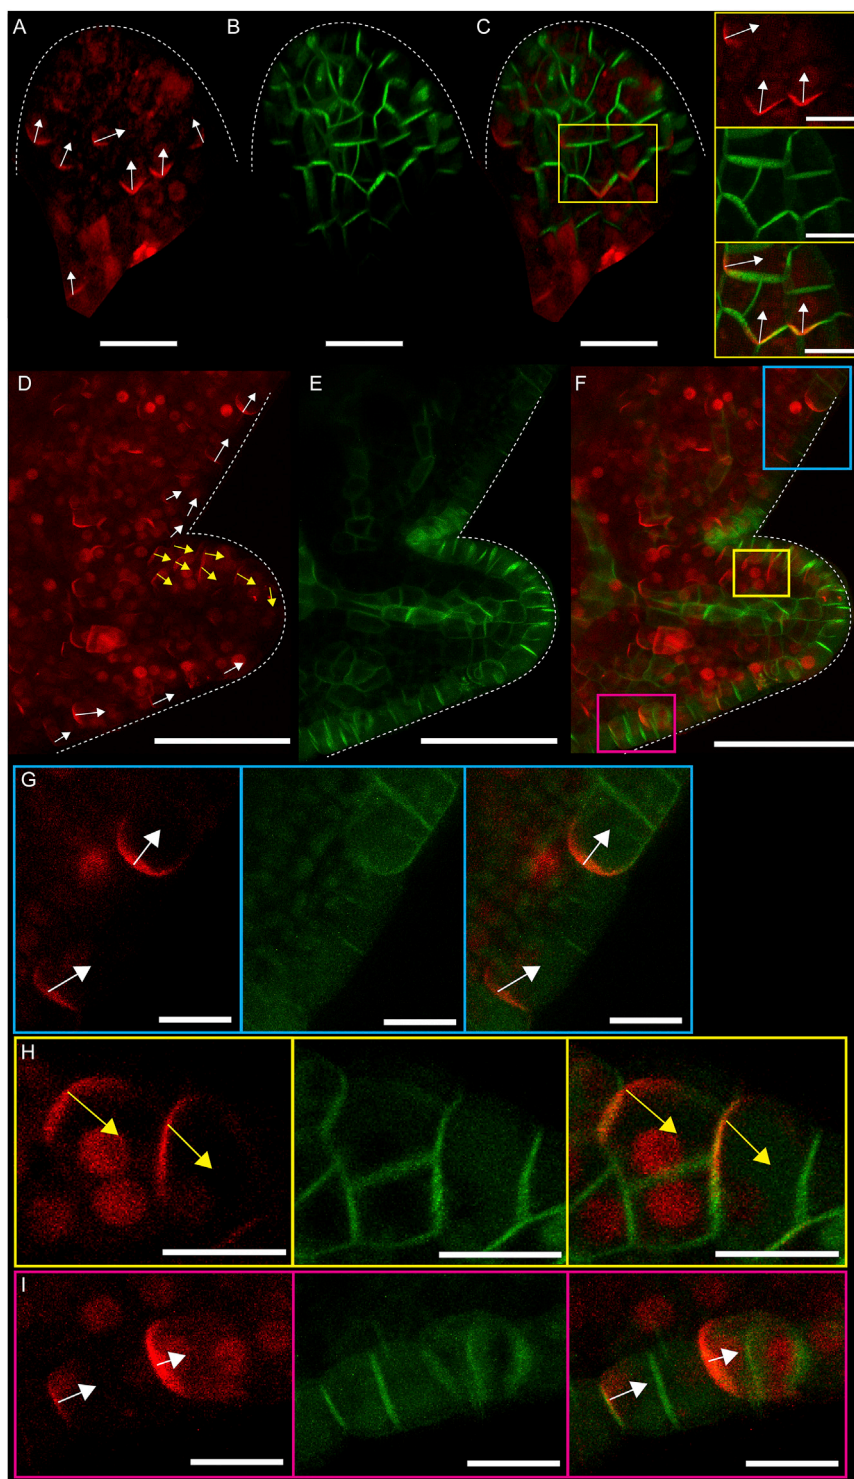

**Figure 4. Ectopic mCherry-BASL Localizes to the Opposite End of Cells to PIN1 Mirroring Convergence and Divergence Points at Serrations**

(A) Induced *35S::mCherry-BASL* in leaf primordium. Arrows indicate manually assigned BASL polarity based on curvature of the BASL crescent. (B) *PIN1::PIN1-GFP* in same primordium as (A). (C) mCherry-BASL and PIN1-GFP signals combined. Yellow box indicates magnified region of leaf. Scale bars are 20  $\mu\text{m}$  in (A)–(C) and 10  $\mu\text{m}$  in close-up regions of (C).

(D) Induced *35S::mCherry-BASL* at serration of leaf 5. Arrows are manually assigned, and yellow arrows highlight cells in which BASL is not proximally localized.

(E) *PIN1::PIN1-GFP* in same serration as shown in (D).

(F) mCherry-BASL and PIN1-GFP signals combined. Projections allow visualization of margin cells. Scale bars are 50  $\mu\text{m}$  in (D)–(F).

(G–I) Magnified regions of serration in (F) in blue (G), yellow (H), and magenta (I) boxes, respectively. z slices were selected to allow visualization of cells due to curvature of serrations. *35S::mCherry-BASL* (left), *PIN1::PIN1-GFP* (middle), and combined signals (right). White dotted lines indicate leaf outline. Scale bars are 10  $\mu\text{m}$  in (G)–(I).

See also [Figure S3](#).

confirmed by calculating the angle between the BASL vector and the cell long axis ([Figure S4D](#)). Thus, the divergent pattern of the ectopic BASL polarity field could be a consequence of cell shape anisotropy and the way polarity is assigned to cells.

To test this possibility, we analyzed the subset of cells from the wild-type background, which had a nearly isotropic shape ([Figure S4](#)). Ectopic BASL vectors of these near-isotropic cells showed a preferential proximodistal orientation, including the splayed-out pattern in the proximal region of the lamina ([Figures 3F and 3G](#)). The leaf was subdivided into regions, and average vectors from the isotropic cells were calculated. This also showed the splaying out across the lamina ([Figure 3H and Table S2](#)). Thus, the observed divergent proximodistal polarity field is not dependent on cell shape anisotropy, consistent with cell polarity orientation

To evaluate the effect of such cell shape anisotropy on polarity measurements, we determined the orientation of the long axis of each cell ([Figures 3B and 3C](#)). This showed that, on average, cells were preferentially elongated in a divergent pattern like that of the axial component of the ectopic BASL polarity field ([Figures 3B and 3D](#)), and this correlation was also

being a guiding factor rather than consequence of oriented growth.

#### **Ectopic BASL and PIN Mark a Common Polarity Field**

The ectopic BASL polarity field resembles that for PIN1 localization at early stages of leaf development, except that whereas

BASL localizes proximally, PIN1 in epidermal cells localizes distally [25]. It is possible that both polarity markers are part of a common system, with PIN involved in early establishment of polarity and ectopic BASL revealing a polarity that is maintained through to later stages. To determine the relationship between PIN1 and BASL localization, we developed a line with inducible *35S::mCherry-BASL* also expressing *PIN1::PIN1-GFP* so that both polarity markers could be visualized in the same cells, though BASL signal was less uniform across the tissue than in the inducible *35S::GFP-BASL* line.

Induction of ectopic BASL in young leaf primordia showed that it localized to the proximal end of cells (Figure 4A) at a time when PIN1 was expressed. PIN1 had a broader distribution than ectopic BASL at this stage, making its polarity harder to assign (Figures 4B and 4C). Induction of ectopic BASL at later stages showed that co-expression with epidermal PIN1 expression was only observed in developing serrations (Figures 4D–4F). A region of reversed ectopic BASL polarity (yellow arrows) was seen at the distal edge of the serration, creating BASL convergence and divergence points (Figures 4D and 4F–4I). This BASL polarity pattern mirrors PIN1 convergence and divergence points previously described [5], with BASL localizing to the opposite end of the cell compared to that reported for PIN1. It has been shown that the PIN1 polarity pattern at serrations depends on a feedback loop involving auxin transport [5], suggesting that the polarity revealed by ectopic BASL is coupled to the same polarity-coordinating mechanism. To test the role of polar auxin transport in BASL localization, we grew seedlings on naphthylphthalamic acid (NPA), an auxin transport inhibitor, before inducing ectopic BASL. In NPA-treated seedlings, which exhibited root and leaf shape phenotypes [26, 27], ectopic BASL was still proximally localized (Figures S3H–S3M). The relationship between PIN, auxin, and ectopic BASL localization can vary, as ectopic BASL in roots has been shown to localize to the same end of cells as PIN or the opposite end, depending on the cell type and PIN family member [11].

### Origin of the Polarity Field

The coordination of the proximodistal polarity field throughout the leaf epidermis could be accounted for by mechanical and/or chemical mechanisms [22, 24, 28–31]. The observation that mechanical stretching of a leaf can deflect the polarity field, as revealed by BRXL2 reorientation, indicates that tissue-wide mechanical forces can influence polarity [2]. However, the nature of polarity as a vector (with an arrow head) means that tissue stress, which has axially but not polarity, is not sufficient to establish the directional aspect of the vector field [32–34]; thus, a stress gradient would be required [24]. Alternatively, a biochemical mechanism, such as flux sensing or cell-cell coupling, may underlie the coordination of the polarity field [22, 35, 36]. Such a mechanism has the advantage of being uncoupled from the stresses generated through differential growth [34].

In addition to influencing growth, the polarity field may also influence patterning and differentiation (e.g., trichomes [3, 4], stomatal patterning [16]). Orientation of both BASL and BRXL2 in stomatal patterning exhibits proximodistal coordination, albeit much weaker than observed for the non-stomatal lineage cells in the *spch* mutant. Although polarity is critical for stomatal spacing in *Arabidopsis* [16, 37], it is unclear why proximodistal

coordination would be functionally important. It is possible that the coordination reflects evolutionary history rather than current function. Stomatal patterning mechanisms vary among plant species [11, 38–42]. By contrast, a proximodistal polarity field may be a highly conserved system for orienting tissue growth and transport [43–45]. Perhaps various elements of the proximodistal polarity system were co-opted for stomatal patterning in different plant lineages. For the lineage leading to *Arabidopsis*, co-option may have led to a polarity-switching mechanism and the evolution of BASL. This hypothesis would account for why BASL cross-reacts with the proximal address when ectopically expressed. Other plant lineages, such as grasses, which exhibit strong proximodistal coordination in stomatal patterning [38, 46], might represent different ways of co-opting elements of a fundamental proximodistal field.

Thus, the proximodistal field described here may have provided key elements that were co-opted during evolution for controlling patterns of differentiation and spacing. In addition, it may provide a conserved system for orienting growth in planar plant organs, similar to equivalent systems described for animal development [1].

### STAR★METHODS

Detailed methods are provided in the online version of this paper and include the following:

- KEY RESOURCES TABLE
- CONTACT FOR REAGENT AND RESOURCE SHARING
- EXPERIMENTAL MODEL AND SUBJECT DETAILS
  - Growth conditions
  - Genetic material
- METHOD DETAILS
  - Construction of transgenic plants
  - Propidium iodide staining
  - Confocal microscopy
  - Oryzalin treatment
  - NPA treatment
- QUANTIFICATION AND STATISTICAL ANALYSIS
  - Cells-from-leaves and cells-from-leaves-tagger software
  - sampleArrows8 software and cellLongAxisCorr7 software
  - Additional image analysis
- DATA AND SOFTWARE AVAILABILITY
- ADDITIONAL RESOURCES

### SUPPLEMENTAL INFORMATION

Supplemental Information includes four figures and two tables and can be found with this article online at <https://doi.org/10.1016/j.cub.2018.06.019>.

### ACKNOWLEDGMENTS

We thank Desmond Bradley, Beatriz Gonçalves, Christopher Whitewoods, Anabel Whibley, and Karen Lee for helpful discussions and comments on the manuscript and Christine Faulkner for comments, suggestions, and support. Thanks to Dominique Bergmann for providing plant lines, vectors, and helpful comments on the manuscript. We thank Florent Pantin, Samantha Fox, Xana Rebocho, Tom Lawrenson, and Yoselin Benitez-Alfonso for help with making the heat shock destination vector. Thanks to JIC Bioimaging, particularly Grant



Calder, and horticultural services for technical support. This work was supported by BBSRC (BB/L008920/1, BB/J004588/1, BBS/E/J/000PR9787, and BB/P013511/1) and the ERC grant Carnomorph (ERC-2012-AdG-323028). C.M. was supported by a PhD studentship from the John Innes Foundation.

#### AUTHOR CONTRIBUTIONS

C.M., J.C., and E.C. conceived and designed the study. C.M. and J.C. acquired data and developed resources. C.M., J.L.N., and T.S.G.O. analyzed the data. C.M., J.L.N., J.C., and E.C. interpreted the data. J.L.N., T.S.G.O., and M.H. developed software. J.C. and E.C. provided supervision. C.M. and E.C. wrote the manuscript. All authors reviewed and revised the manuscript.

#### DECLARATION OF INTERESTS

The authors declare no competing interests.

Received: January 18, 2018

Revised: May 2, 2018

Accepted: June 11, 2018

Published: August 9, 2018

#### REFERENCES

- Goodrich, L.V., and Strutt, D. (2011). Principles of planar polarity in animal development. *Development* 138, 1877–1892.
- Bringmann, M., and Bergmann, D.C. (2017). Tissue-wide Mechanical Forces Influence the Polarity of Stomatal Stem Cells in Arabidopsis. *Curr. Biol.* 27, 877–883.
- Hülkamp, M., Misra, S., and Jürgens, G. (1994). Genetic dissection of trichome cell development in Arabidopsis. *Cell* 76, 555–566.
- Bouyer, D., Kirik, V., and Hülkamp, M. (2001). Cell polarity in Arabidopsis trichomes. *Semin. Cell Dev. Biol.* 12, 353–356.
- Bilsborough, G.D., Runions, A., Barkoulas, M., Jenkins, H.W., Hasson, A., Galinha, C., Laufs, P., Hay, A., Prusinkiewicz, P., and Tsiantis, M. (2011). Model for the regulation of Arabidopsis thaliana leaf margin development. *Proc. Natl. Acad. Sci. USA* 108, 3424–3429.
- Guenot, B., Bayer, E., Kierzkowski, D., Smith, R.S., Mandel, T., Žádníková, P., Benková, E., and Kuhlemeier, C. (2012). Pin1-independent leaf initiation in Arabidopsis. *Plant Physiol.* 159, 1501–1510.
- Richardson, A.E., Rebocho, A.B., and Coen, E.S. (2016). Ectopic KNOX Expression Affects Plant Development by Altering Tissue Cell Polarity and Identity. *Plant Cell* 28, 2079–2096.
- Kuchen, E.E., Fox, S., de Reuille, P.B., Kennaway, R., Bensmihen, S., Avondo, J., Calder, G.M., Southam, P., Robinson, S., Bangham, A., and Coen, E. (2012). Generation of leaf shape through early patterns of growth and tissue polarity. *Science* 335, 1092–1096.
- Lawrence, P.A., Struhl, G., and Casal, J. (2007). Planar cell polarity: one or two pathways? *Nat. Rev. Genet.* 8, 555–563.
- Krecek, P., Skupa, P., Libus, J., Naramoto, S., Tejos, R., Friml, J., and Zazimalová, E. (2009). The PIN-FORMED (PIN) protein family of auxin transporters. *Genome Biol.* 10, 249.
- Dong, J., MacAlister, C.A., and Bergmann, D.C. (2009). BASL controls asymmetric cell division in Arabidopsis. *Cell* 137, 1320–1330.
- Pillitteri, L.J., Peterson, K.M., Horst, R.J., and Torii, K.U. (2011). Molecular profiling of stomatal meristemoids reveals new component of asymmetric cell division and commonalities among stem cell populations in Arabidopsis. *Plant Cell* 23, 3260–3275.
- Truernit, E., Bauby, H., Belcram, K., Barthélémy, J., and Palauqui, J.-C. (2012). OCTOPUS, a polarly localised membrane-associated protein, regulates phloem differentiation entry in Arabidopsis thaliana. *Development* 139, 1306–1315.
- Shimotohno, A., Sotta, N., Sato, T., De Ruvo, M., Marée, A.F.M., Grieneisen, V.A., and Fujiwara, T. (2015). Mathematical modeling and experimental validation of the spatial distribution of boron in the root of Arabidopsis thaliana identify high boron accumulation in the tip and predict a distinct root tip uptake function. *Plant Cell Physiol.* 56, 620–630.
- Abley, K., Sauret-Güeto, S., Marée, A.F.M., and Coen, E. (2016). Formation of polarity convergences underlying shoot outgrowths. *eLife* 5, 1–60.
- Robinson, S., Barbier de Reuille, P., Chan, J., Bergmann, D., Prusinkiewicz, P., and Coen, E. (2011). Generation of spatial patterns through cell polarity switching. *Science* 333, 1436–1440.
- Gallois, J.L., Woodward, C., Reddy, G.V., and Sablowski, R. (2002). Combined SHOOT MERISTEMLESS and WUSCHEL trigger ectopic organogenesis in Arabidopsis. *Development* 129, 3207–3217.
- Pillitteri, L.J., Sloan, D.B., Bogenschutz, N.L., and Torii, K.U. (2007). Termination of asymmetric cell division and differentiation of stomata. *Nature* 445, 501–505.
- Fu, Y., Gu, Y., Zheng, Z., Wasteneys, G., and Yang, Z. (2005). Arabidopsis interdigitating cell growth requires two antagonistic pathways with opposing action on cell morphogenesis. *Cell* 120, 687–700.
- Armour, W.J., Barton, D.A., Law, A.M.K., and Overall, R.L. (2015). Differential Growth in Periclinal and Anticlinal Walls during Lobe Formation in Arabidopsis Cotyledon Pavement Cells. *Plant Cell* 27, 2484–2500.
- Chen, J., Wang, F., Zheng, S., Xu, T., and Yang, Z. (2015). Pavement cells: a model system for non-transcriptional auxin signalling and crosstalks. *J. Exp. Bot.* 66, 4957–4970.
- Abley, K., De Reuille, P.B., Strutt, D., Bangham, A., Prusinkiewicz, P., Marée, A.F.M., Grieneisen, V.A., and Coen, E. (2013). An intracellular partitioning-based framework for tissue cell polarity in plants and animals. *Development* 140, 2061–2074.
- Asnacios, A., and Hamant, O. (2012). The mechanics behind cell polarity. *Trends Cell Biol.* 22, 584–591.
- Heisler, M.G., Hamant, O., Krupinski, P., Uyttewaal, M., Ohno, C., Jönsson, H., Traas, J., and Meyerowitz, E.M. (2010). Alignment between PIN1 polarity and microtubule orientation in the shoot apical meristem reveals a tight coupling between morphogenesis and auxin transport. *PLoS Biol.* 8, e1000516.
- Scarpella, E., Marcos, D., Friml, J., and Berleth, T. (2006). Control of leaf vascular patterning by polar auxin transport. *Genes Dev.* 20, 1015–1027.
- Hay, A., Barkoulas, M., and Tsiantis, M. (2006). ASYMMETRIC LEAVES1 and auxin activities converge to repress BREVIPEDICELLUS expression and promote leaf development in Arabidopsis. *Development* 133, 3955–3961.
- Casimiro, I., Marchant, A., Bhalerao, R.P., Beeckman, T., Dhooge, S., Swarup, R., Graham, N., Inzé, D., Sandberg, G., Casero, P.J., and Bennett, M. (2001). Auxin transport promotes Arabidopsis lateral root initiation. *Plant Cell* 13, 843–852.
- Hervieux, N., Dumond, M., Sapala, A., Routier-Kierzkowska, A.-L., Kierzkowski, D., Roeder, A.H.K., Smith, R.S., Boudaoud, A., and Hamant, O. (2016). A Mechanical Feedback Restricts Sepal Growth and Shape in Arabidopsis. *Curr. Biol.* 26, 1–10.
- Sassi, M., and Traas, J. (2015). When biochemistry meets mechanics: a systems view of growth control in plants. *Curr. Opin. Plant Biol.* 28, 137–143.
- Whitewoods, C.D., and Coen, E. (2017). Growth and Development of Three-Dimensional Plant Form. *Curr. Biol.* 27, R910–R918.
- Bennett, T., Hines, G., and Leyser, O. (2014). Canalization: what the flux? *Trends Genet.* 30, 41–48.
- Goriely, A. (2017). *The Mathematics and Mechanics of Biological Growth* (New York, NY: Springer).
- Hejnowicz, Z., and Romberger, J.A. (1984). Growth tensor of plant organs. *J. Theor. Biol.* 110, 93–114.
- Coen, E., Kennaway, R., and Whitewoods, C. (2017). On genes and form. *Development* 144, 4203–4213.

35. Mitchison, G.J. (1980). A Model for Vein Formation in Higher Plants. *Proc. R. Soc. Lond. B Biol. Sci.* *207*, 79–109.
36. Rolland-Lagan, A.-G., and Prusinkiewicz, P. (2005). Reviewing models of auxin canalization in the context of leaf vein pattern formation in *Arabidopsis*. *Plant J.* *44*, 854–865.
37. Lau, O.S., and Bergmann, D.C. (2012). Stomatal development: a plant's perspective on cell polarity, cell fate transitions and intercellular communication. *Development* *139*, 3683–3692.
38. Raissig, M.T., Abrash, E., Bettadapur, A., Vogel, J.P., and Bergmann, D.C. (2016). Grasses use an alternatively wired bHLH transcription factor network to establish stomatal identity. *Proc. Natl. Acad. Sci. USA* *113*, 8326–8331.
39. Cartwright, H.N., Humphries, J.A., and Smith, L.G. (2009). PAN1: a receptor-like protein that promotes polarization of an asymmetric cell division in maize. *Science* *323*, 649–651.
40. Vatén, A., and Bergmann, D.C. (2012). Mechanisms of stomatal development: an evolutionary view. *Evodevo* *3*, 11.
41. Chater, C.C.C., Caine, R.S., Fleming, A.J., and Gray, J.E. (2017). Origins and Evolution of Stomatal Development. *Plant Physiol.* *174*, 624–638.
42. Rudall, P.J., Chen, E.D., and Cullen, E. (2017). Evolution and development of monocot stomata. *Am. J. Bot.* *104*, 1122–1141.
43. Nelson, W.J. (2003). Adaptation of core mechanisms to generate cell polarity. *Nature* *422*, 766–774.
44. Strutt, H., and Strutt, D. (2009). Asymmetric localisation of planar polarity proteins: Mechanisms and consequences. *Semin. Cell Dev. Biol.* *20*, 957–963.
45. Meinhardt, H. (2007). Computational modelling of epithelial patterning. *Curr. Opin. Genet. Dev.* *17*, 272–280.
46. Facette, M.R., and Smith, L.G. (2012). Division polarity in developing stomata. *Curr. Opin. Plant Biol.* *15*, 585–592.
47. Nelson, B.K., Cai, X., and Nebenführ, A. (2007). A multicolored set of in vivo organelle markers for co-localization studies in *Arabidopsis* and other plants. *Plant J.* *51*, 1126–1136.
48. MacAlister, C.A., Ohashi-Ito, K., and Bergmann, D.C. (2007). Transcription factor control of asymmetric cell divisions that establish the stomatal lineage. *Nature* *445*, 537–540.
49. Benková, E., Michniewicz, M., Sauer, M., Teichmann, T., Seifertová, D., Jürgens, G., and Friml, J. (2003). Local, efflux-dependent auxin gradients as a common module for plant organ formation. *Cell* *115*, 591–602.
50. Ueda, K., Matsuyama, T., and Hashimoto, T. (1999). Visualization of microtubules in living cells of transgenic *Arabidopsis thaliana*. *Protoplasma* *206*, 201–206.
51. Wachsman, G., Heidstra, R., and Scheres, B. (2011). Distinct cell-autonomous functions of RETINOBLASTOMA-RELATED in *Arabidopsis* stem cells revealed by the Brother of Rainbow clonal analysis system. *Plant Cell* *23*, 2581–2591.
52. Karimi, M., De Meyer, B., and Hilson, P. (2005). Modular cloning in plant cells. *Trends Plant Sci.* *10*, 103–105.
53. Clough, S.J., and Bent, A.F. (1998). Floral dip: a simplified method for *Agrobacterium*-mediated transformation of *Arabidopsis thaliana*. *Plant J.* *16*, 735–743.
54. Calder, G., Hindle, C., Chan, J., and Shaw, P. (2015). An optical imaging chamber for viewing living plant cells and tissues at high resolution for extended periods. *Plant Methods* *11*, 22.
55. Chan, J., Calder, G., Fox, S., and Lloyd, C. (2007). Cortical microtubule arrays undergo rotary movements in *Arabidopsis* hypocotyl epidermal cells. *Nat. Cell Biol.* *9*, 171–175.
56. Olsson, T.S.G., and Hartley, M. (2016). jicbioimage: a tool for automated and reproducible bioimage analysis. *PeerJ* *4*, e2674.
57. Schindelin, J., Arganda-Carreras, I., Frise, E., Kaynig, V., Longair, M., Pietzsch, T., Preibisch, S., Rueden, C., Saalfeld, S., Schmid, B., et al. (2012). Fiji: an open-source platform for biological-image analysis. *Nat. Methods* *9*, 676–682.

## STAR★METHODS

## KEY RESOURCES TABLE

| REAGENT or RESOURCE                                                                          | SOURCE                  | IDENTIFIER                                                                                                                                                                                                                                          |
|----------------------------------------------------------------------------------------------|-------------------------|-----------------------------------------------------------------------------------------------------------------------------------------------------------------------------------------------------------------------------------------------------|
| Chemicals, Peptides, and Recombinant Proteins                                                |                         |                                                                                                                                                                                                                                                     |
| Propidium Iodide                                                                             | Sigma-Aldrich           | Cat# P4170                                                                                                                                                                                                                                          |
| Spe I                                                                                        | Sigma-Aldrich           | 11008943001                                                                                                                                                                                                                                         |
| BspEI                                                                                        | New England Biolabs     | Cat# R0540S                                                                                                                                                                                                                                         |
| ccdB-resistant one-shot <i>E. coli</i>                                                       | ThermoFisher Scientific | Cat# A10460                                                                                                                                                                                                                                         |
| Difco agar                                                                                   | Becton & Dickinson      | Cat# 214030                                                                                                                                                                                                                                         |
| Oryzalin                                                                                     | Sigma-Aldrich           | Cat# 36182                                                                                                                                                                                                                                          |
| N-1-naphthylphthalamic acid (NPA)                                                            | ChemService             | N-12507                                                                                                                                                                                                                                             |
| Critical Commercial Assays                                                                   |                         |                                                                                                                                                                                                                                                     |
| iDNA genetics copy number analysis                                                           | iDNA genetics           | N/A                                                                                                                                                                                                                                                 |
| Experimental Models: Organisms/Strains                                                       |                         |                                                                                                                                                                                                                                                     |
| Heat-shock inducible BASL (35S::GFP-BASL)                                                    | This paper              | N/A                                                                                                                                                                                                                                                 |
| BASL::GFP-BASL                                                                               | [11]                    | N/A                                                                                                                                                                                                                                                 |
| RFP-plasma membrane (pm-rb)                                                                  | [47]                    | CD3-1008                                                                                                                                                                                                                                            |
| RFP-plasma membrane with inducible 35S::GFP-BASL                                             | This paper              | N/A                                                                                                                                                                                                                                                 |
| <i>spch</i> mutant ( <i>spch-1</i> )                                                         | [48]                    | N/A                                                                                                                                                                                                                                                 |
| <i>spch</i> with inducible BASL (35S::GFP-BASL)                                              | This paper              | N/A                                                                                                                                                                                                                                                 |
| HS::Cre                                                                                      | [17]                    | N/A                                                                                                                                                                                                                                                 |
| PIN1::PIN1-GFP                                                                               | [49]                    | N/A                                                                                                                                                                                                                                                 |
| Heat-shock inducible 35S::mCherry-BASL with PIN1::PIN1-GFP                                   | This paper              | N/A                                                                                                                                                                                                                                                 |
| 35S::TUA6-GFP                                                                                | [50]                    | N/A                                                                                                                                                                                                                                                 |
| Oligonucleotides                                                                             |                         |                                                                                                                                                                                                                                                     |
| F_BOB_lox_speI (GGGACTAGTATCGCGGCCGCTTCGAAA)                                                 | This paper              | N/A                                                                                                                                                                                                                                                 |
| R_BOB_lox_N (CTATACGAAGTTATACGCGTCTGT)                                                       | This paper              | N/A                                                                                                                                                                                                                                                 |
| R3_BOB_lox_EcoRV (GGGATATCATAACTTCGTATAAAGTAT CCTATACGAAGTTATACGCGTCTG)                      | This paper              | N/A                                                                                                                                                                                                                                                 |
| Recombinant DNA                                                                              |                         |                                                                                                                                                                                                                                                     |
| pBOB vector                                                                                  | [51]                    | N/A                                                                                                                                                                                                                                                 |
| TOPO4 vector                                                                                 | Invitrogen              | N/A                                                                                                                                                                                                                                                 |
| pB7WGC2 vector                                                                               | [52] (VIB Gent)         | N/A                                                                                                                                                                                                                                                 |
| GFP-BASL entry clone                                                                         | [11]                    | N/A                                                                                                                                                                                                                                                 |
| Destination vector with lox-HDEL::CyPET::NOS-Terminator-lox (Active blue destination vector) | This paper              | N/A                                                                                                                                                                                                                                                 |
| Software and Algorithms                                                                      |                         |                                                                                                                                                                                                                                                     |
| cellfromleaves                                                                               | This paper              | Github; <a href="https://github.com/JIC-Image-Analysis/cells-from-leaves">https://github.com/JIC-Image-Analysis/cells-from-leaves</a>                                                                                                               |
| cellsfromleavestagger                                                                        | This paper              | Github; <a href="https://github.com/JIC-Image-Analysis/cells-from-leaves-tagger">https://github.com/JIC-Image-Analysis/cells-from-leaves-tagger</a>                                                                                                 |
| sampleArrows8                                                                                | This paper              | Github; <a href="https://github.com/JIC-Image-Analysis/cells-from-leaves/tree/master/matlab_scripts">https://github.com/JIC-Image-Analysis/cells-from-leaves/tree/master/matlab_scripts</a>                                                         |
| cellLongAxisCorr7                                                                            | This paper              | Github; <a href="https://github.com/JIC-Image-Analysis/cells-from-leaves/tree/master/matlab_scripts">https://github.com/JIC-Image-Analysis/cells-from-leaves/tree/master/matlab_scripts</a>                                                         |
| VolViewer                                                                                    |                         | <a href="http://cmpdartsvr3.cmp.uea.ac.uk/wiki/BanghamLab/index.php/Software#Viewing_and_measuring_volume_images:_VolViewer">http://cmpdartsvr3.cmp.uea.ac.uk/wiki/BanghamLab/index.php/Software#Viewing_and_measuring_volume_images:_VolViewer</a> |

## CONTACT FOR REAGENT AND RESOURCE SHARING

Further information and requests for resources and reagents should be directed to and will be fulfilled by the Lead Contact, Enrico Coen ([enrico.coen@jic.ac.uk](mailto:enrico.coen@jic.ac.uk)).

## EXPERIMENTAL MODEL AND SUBJECT DETAILS

### Growth conditions

*Arabidopsis* plants were grown on plates containing MS media (0.441% Murashige & skoog including vitamins, 1% (w/v) glucose, 0.05% (w/v) MES, 1% Difco agar, pH to 5.7) and relevant antibiotic selection. Seeds were gas or surface sterilized and stratified in the dark at 4°C for 3 days, then grown at 20°C in long day conditions (16 hours light, 8 hours dark). Leaves were taken from plants up to 9 days after stratification for imaging and analysis.

### Genetic material

The transgenic lines *spch-1* [48], *HS::Cre* [17], *BASL::BASL-GFP* [11], RFP-PM [47], *PIN1::PIN1-GFP* [49] and *35S::TUA6-GFP* [50] are in the Col-0 background.

## METHOD DETAILS

### Construction of transgenic plants

We used Gateway cloning to construct heat-shock inducible *35S::GFP-BASL* line which required a destination vector and an entry vector. We made a destination vector (which we refer to Active Blue destination vector) containing a 35S promoter in front of a CyPET:HDEL fluorescent marker and a Nos terminator flanked by lox sites. These lox sites will later allow heat-shock recombination to remove the fluorescent marker so that the 35S promoter drives a downstream gene of interest.

The Active Blue destination vector was made using a pre-existing Gateway vector, pB7WGC [52] and the pBOB [51] vector. The procedure involved 2 steps. In the first step, a 1175 bp fragment containing lox-HDEL: CyPET:NOS-Terminator-lox was cloned from pBOB and flanked with SpeI and EcoRV sites using a 2-step PCR, involving the primers F\_BOB\_lox\_speI and R\_BOB\_lox\_N, then primers F\_BOB\_lox\_speI and R3\_BOB\_lox\_EcoRV. The PCR product was then cloned into TOPO4. In the second step, the pB7WGC2 vector was digested with SpeI and BspEI, to excise a 1175 bp fragment containing ECFP, and replaced with the fragment cloned from pBOB vector (cut out from the TOPO4 vector using SpeI and BspEI). The ligation product was transformed into ccdB-resistant one-shot *E. coli*.

To introduce GFP-BASL into the destination vector, an LR reaction (Invitrogen) was carried out using the Active Blue destination vector and an entry clone containing GFP-BASL [11].

For transformation of *Arabidopsis* plants, *Agrobacterium tumefaciens* strain GV3101 and floral dip method were used [53] to dip into *HS::Cre* [17] containing plants. Three independent lines were obtained showing the same pattern. The line used is a single copy, single insert line (iDNA genetics).

The inducible *35S::BASL-GFP* line was crossed to the heterozygous *spch-1* mutant plants and offspring containing *spch-1* and inducible *35S::BASL-GFP* were selected by phenotype and growing on selective plates (Basta for *35S::BASL-GFP*, Kanamycin for *HS::Cre*). The inducible *35S::BASL-GFP* line was crossed to the RFP-PM line [47] and offspring containing RFP-PM and inducible *35S::BASL-GFP* were selected by growing on selective plates and screening for RFP.

To make the line with inducible *35S::mCherry-BASL* and *PIN1::PIN1-GFP*, we generated a construct containing inducible *35S::mCherry-BASL* and *HS::Cre* using golden gate cloning and dipped [53] this into *PIN1::PIN1-GFP* [49] containing plants. The line used contains 2 copies (iDNA genetics). The *35S::loxmCherry-BASLloxCyPET-HSP18::CRE-35S::Basta-35S::CyPET-RC12A* (called inducible *35S::mCherry-BASL* for simplicity) construct was created by Golden Gate cloning in the vector pAGM4723 (Addgene #48015) as described by Weber et al. (2011). Level 0 modules were domesticated to remove BsaI, BpII and DraIII restriction sites and synthesized synthetically. To generate the lox-flanked mCherry Level 1 module we adapted the standard Golden Gate protocol to incorporate an additional assembly step, termed Level 0.5. Here the vector backbone EC10161 is opened by the enzyme Esp3I to allow the insertion of Level 0 modules cut by BsaI, just as for standard Level 1 cloning. This generates loxP flanked modules in the 'U' position suitable for use in subsequent Level 1 assembly. Sequences to be used in loxP-flanked modules were domesticated to be free of Esp3I sites in addition to BsaI, BpII and DraIII recognition sites. Plasmid maps are available on request.

### Propidium iodide staining

To stain leaves with propidium iodide, leaves were submerged in a 2.5 µg/ml propidium iodide solution (PI - Sigma) for at least 15 minutes before imaging.

### Confocal microscopy

For confocal imaging, leaves (typically first true leaf other than for serrations) were placed in water under a coverslip, or in the optical imaging chamber [54]. Imaging was performed using a x10 or x20 dry lens, or x40 oil lens, on a Leica SP5 confocal microscope equipped with Leica HyD Hybrid detectors, or a Zeiss 780. For imaging GFP, argon ion (488 nm) excitation laser was used, collected

at 495–530 nm. For PI, mCherry and RFP, 561 nm excitation was used, collected at 625–690 nm for PI, 575–630 for RFP and 600–620 nm for mCherry. Leaves were staged according to leaf width and were typically imaged 48-hours after heat-shock. Seedlings were typically heat-shocked for 20 minutes to induce BASL across the entire lamina, and 3 mins to induce sectors.

To image *35S::GFP-BASL* appearing after induction, 7 day old seedlings were heat-shocked for 20 mins and placed in an imaging chamber with media as described in [55]. Leaves were imaged every hour using a Zeiss 780 confocal microscope, with the settings described above.

### Oryzalin treatment

Oryzalin was added to 6-day old seedlings (*35S::GFP-BASL* line described above and *35S::GFP-TUA6* as control line) at a concentration of 20  $\mu$ M. Seedlings expressing *35S::TUA6-GFP* have previously been described [50]. *35S::TUA6-GFP* seedlings confirmed microtubules had depolymerized after 4 hours and seedlings were heat-shocked to induce BASL expression. Plants were imaged 48 hours after heat-shock, with *35S::GFP-TUA6* confirming the absence of microtubules.

### NPA treatment

*35S::GFP-BASL* seedlings were grown on media containing 100  $\mu$ M NPA, or an equivalent concentration of DMSO. Seedlings were heat-shocked 2DAS and leaves imaged 3 days later. Propidium iodide staining (described above) was used to visualize cell outlines.

## QUANTIFICATION AND STATISTICAL ANALYSIS

### Cells-from-leaves and cells-from-leaves-tagger software

For assigning BASL vectors, Python software was developed using jicbioimage [56]. It used the cell outline channel (either plasma-membrane marker or PI stain) from the confocal stack to make a projection of the leaf surface. The leaf surface projection was used to reduce noise by only extracting signal from the volume occupied by the leaf. The cell outline channel extracted from the leaf surface was then used as input to the watershed algorithm. Leaf-specific parameters allowed the surface and segmentation to be customised according to intensity and quality of image. The centroid for each cell was calculated. BASL signal was also extracted from the cell surface.

To avoid bias arising from knowledge of the orientation and position of a cell within the context of the whole leaf, each segmented cell was presented to the user in isolation, randomly rotated in one of four orientations (0, 90, 180, 270 degrees). For each cell the user then selected a point in the middle of any visible BASL crescent, or chose to skip a cell if there was a complication (i.e., if the signal was not easy to identify, or the cell segmentation was incorrect). For a sample leaf image, out of 162 cell assignments of BASL, 157 were based on three-way junctions, and 5 were based on concavity of the BASL signal. The tool produced a directory of JSON files and corresponding image files, recording the BASL orientation in separate files for each cell, along with an image of the cell segmentation. Lastly, BASL vectors were transformed back into the coordinate system of the whole leaf, and written out to a CSV file along with the coordinates of each cell centroid.

### sampleArrows8 software and cellLongAxisCorr7 software

We developed two MATLAB scripts, one to allow us to quantify the BASL vector field (*cellLongAxisCorr7.m*) and one to visualize it in a more informative way (*sampleArrows8.m*).

One script developed, *sampleArrows8*, is for visualizing BASL vectors on the leaf, and down-sampling them. This script uses a leaf image and .csv file of BASL vectors (produced by 'cells from leaves'). The user identifies the leaf midline which is used to rotate the leaf image and BASL vectors to allow the image to be vertically oriented. The script contains various processing and display options, but it is frequently used to display the original BASL arrows on the leaf, colored by orientation with respect to the leaf midvein. The color of each arrow is determined by a color map, where 0 degrees represents the proximodistal orientation.

There can be a lot of BASL vectors on a leaf, with some areas having a very high density of points. BASL vectors can therefore be down-sampled to reduce the total number of vectors displayed and to give a more even spread of BASL vectors across the leaf. Down-sampling uses a triangular grid of points placed over the leaf. For each vertex of the grid, vectors within the distance *Maxdist* are averaged. A parameter, *neighborThreshold*, ensures that down-sampled BASL vectors are only displayed for samples that exceed the threshold number of BASL vectors.

This script can also be applied to cell orientations. This is achieved by gathering cell orientations within a certain radius, normalizing and superimposing them onto the same axis, and then performing principle component analysis (PCA) on that cloud of points.

We also developed a script named *cellLongAxisCorr7*, which quantifies the BASL vector field. This script calculates various angles: orientation of cell axis, angle between BASL vector and its cell axis, and angle between BASL vector and leaf midvein axis. This script uses an image of the leaf and the directory of JSON files to rotate the cells back to their original orientation and cell masks are derived, allowing cell eccentricity (ratio of the distance between the foci of the ellipse fitted to a cell and its major axis length), centroid and orientation of the long axis of the cells to be determined.

For each cell, three angle measurements are made: the angle between the BASL vector (from the JSON files) and the cell long axis, angle between the BASL vector and the leaf midline axis (specified by the user), and the angle between the cell long axis and the leaf midline axis. Subsets of data can be selected by specifying lower and upper threshold values in the script parameters (for cell eccentricity and orientation relative to the leaf). The script displays the orientation information as histograms and also writes it out to

CSV files for further analysis. To select the near-isotropic cells, we first calculated eccentricity of the segmented cells (cell eccentricity is the ratio of the distance between the foci of the ellipse fitted to a cell and its major axis length). Cells with an eccentricity of less than 0.6 were considered near-isotropic.

Further documentation is found in both `sampleArrows8.m` and `cellLongAxisCorr7.m`. These scripts also contain a detailed explanation of each of the input parameters.

### Additional image analysis

BASL crescent length and cell perimeter were calculated by clicking round the BASL signal and cell outline using Fiji [57] measure tool for cells of different sizes. To determine average BASL vector orientations for near isotropic cells in regions of the leaf, `cellLongAxisCorr7` was used with a maximum eccentricity value of 0.6, and vectors were visualized on the leaf using `sampleArrows8`. The leaf was then subdivided into 9 regions and vectors measured in each region measured using Fiji angle tool.

Statistical comparison of BASL vector distributions between genotypes, was performed using chi-square tests ( $df = 1$ , p values less than 0.01 were considered significant), comparing frequency of BASL vectors within or outside the range of  $-80^\circ$  to  $80^\circ$ , in pairwise tests.

For z stacks of leaves expressing *PIN1::PIN-GFP* and *35S::mCherry-BASL*, images were rendered in 3D using Volviewer. For serrations, Fiji was used to create maximum projections for visualization. Specific ranges of z-slices were used to allow visualization of specific cells.

### DATA AND SOFTWARE AVAILABILITY

The custom code that implements the segmentation and random orientation pipeline (`cells-from-leaves`) is available at: <https://github.com/JIC-Image-Analysis/cells-from-leaves>.

The tool for visualizing cell segmentations and selection of BASL signal in the cell (`cells-from-leaves-tagger`) is available at: <https://github.com/JIC-Image-Analysis/cells-from-leaves-tagger>.

MATLAB software for visualization of vectors and angle calculation available at [https://github.com/JIC-Image-Analysis/cells-from-leaves/tree/master/matlab\\_scripts](https://github.com/JIC-Image-Analysis/cells-from-leaves/tree/master/matlab_scripts).

VolViewer available for download from [http://cmpdartsvr3.cmp.uea.ac.uk/wiki/BanghamLab/index.php/Software#Viewing\\_and\\_measuring\\_volume\\_images:\\_VolViewer](http://cmpdartsvr3.cmp.uea.ac.uk/wiki/BanghamLab/index.php/Software#Viewing_and_measuring_volume_images:_VolViewer).

### ADDITIONAL RESOURCES

Plasmid maps for lines generated and raw data for leaf images available on request.

**Current Biology, Volume 28**

**Supplemental Information**

**Ectopic BASL Reveals Tissue Cell Polarity**

**throughout Leaf Development**

**in *Arabidopsis thaliana***

**Catherine Mansfield, Jacob L. Newman, Tjelvar S.G. Olsson, Matthew Hartley, Jordi Chan, and Enrico Coen**

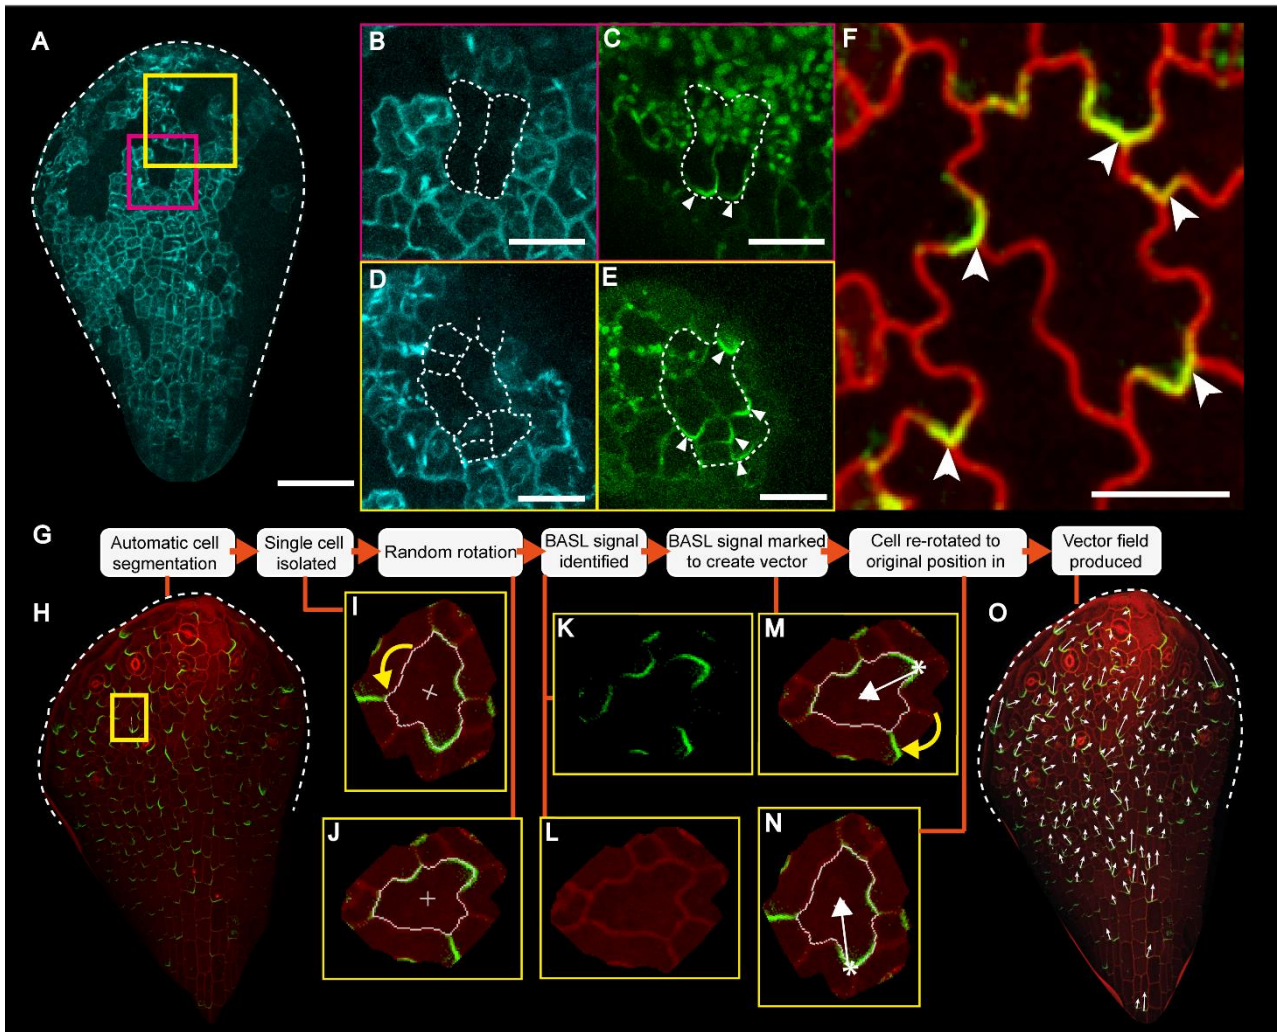

**Figure S1. Vectors can be added to each cell using semi-automated software to show position of BASL signal with respect to the cell centroid. Related to Figure 1 and Figure 2.**

(A) 35S::GFP-BASL induced in small sectors across the leaf (magenta and yellow boxes) composed of a few cells. (B and D) Absence of ER-tagged CFP indicates where sectors are induced. (C and E) GFP-BASL signal in the sectors localised to the proximal end of the cells (BASL signal indicated by white arrowhead). White dashed line indicates leaf outline in A, cell outlines in sectors in B and D and sector outlines in C and E. (F) 3-way junctions between cells (white arrow head) show which cell the 35S::BASL-GFP signal belongs to. Scale bars are 100  $\mu\text{m}$  in A and 20  $\mu\text{m}$  in B-F. (G) Image processing pipeline (using 'cellfromleaves' and 'cellsfromleavestagger' software). (H) Raw confocal data is automatically segmented. (I) Individual cells are identified and position of centroid (cross) is extracted. Yellow arrows indicate cell rotation. (J) Individual cell is randomly rotated in one of 4 orientations. (K and L) BASL signal is identified from merged image of cell and separate colour channels for clearer visualisation. (M) BASL signal marked by hand (indicated by asterisk) to create vector, indicated by white arrow. (N) Cell and vector are rotated back into original position. (O) Process repeated for every segmented cell to produce a vector field for the leaf. White dashed line in H and O indicates leaf outline.



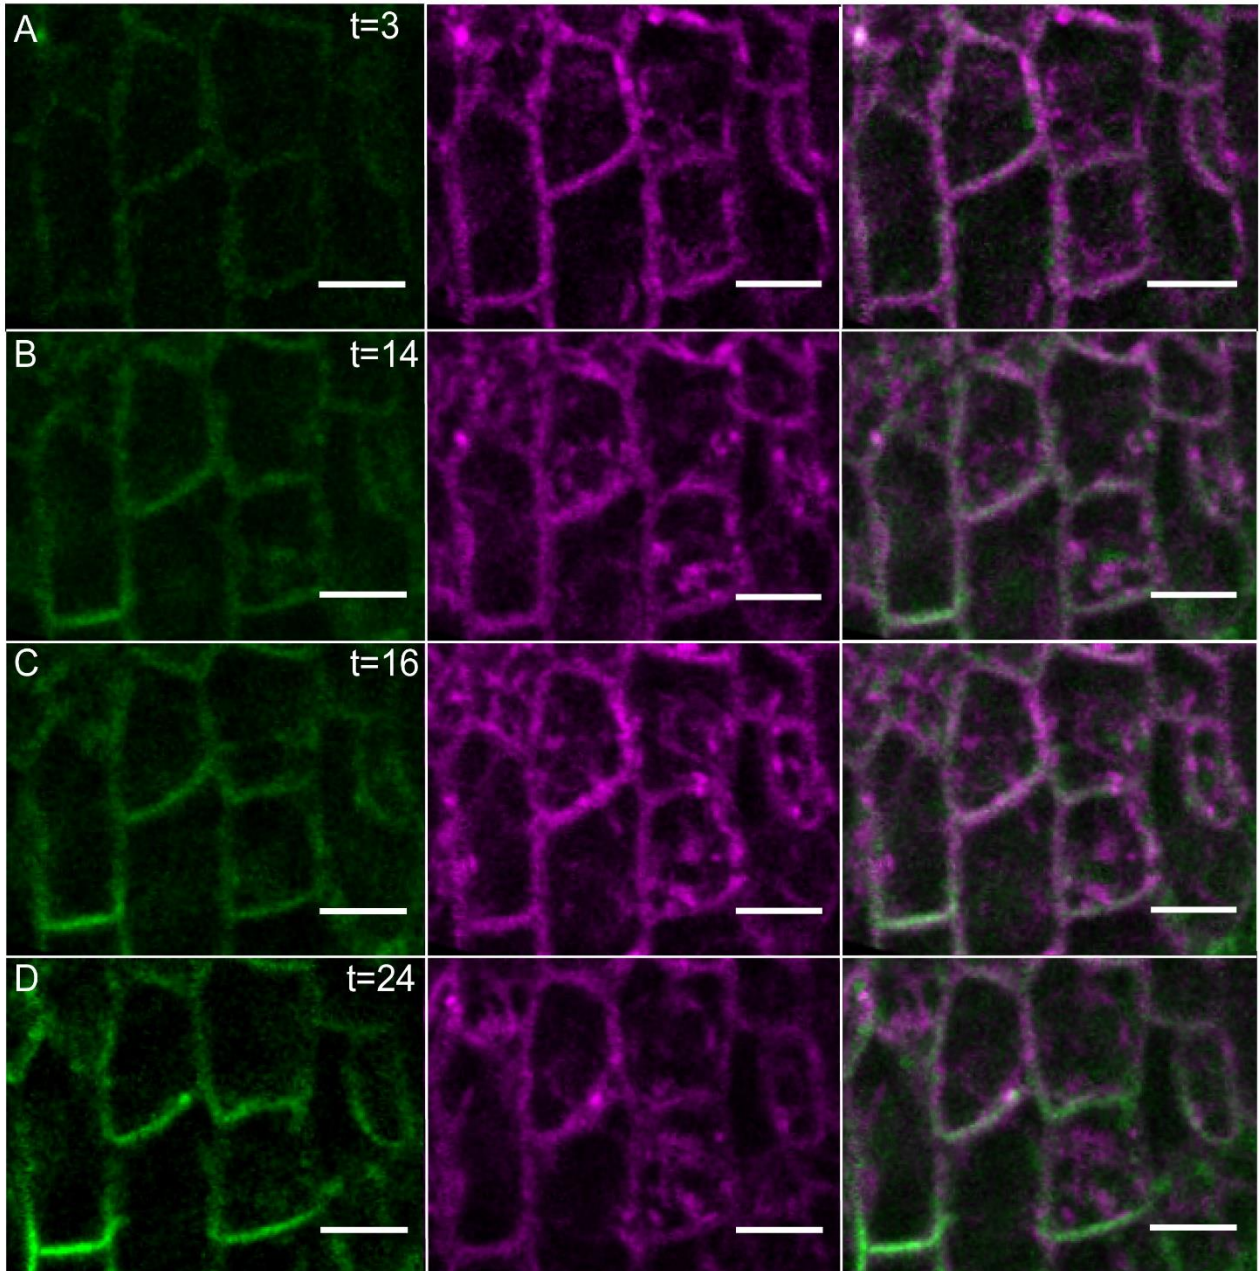

**Figure S2. Time lapse imaging after 35S::GFP-BASL induction. Related to Figure 2.**

(A) 35S::GFP-BASL induction in a wild type background following heat-shock at 3 (A), 14 (B), 16 (C), and 24 (D) hours after heat-shock. At 3 hours, no BASL is seen, comparable to uninduced leaves. Left hand panels show GFP-BASL expression appearing at the proximal end of cells with increasing intensity. Middle panels show ER-localised CFP outside the lox sites, coloured magenta for clear visualisation. Right hand panels show combined GFP-BASL and ER-CFP channels. Scale bars are 10  $\mu$ m. Images are maximum projections of multiple z-slices to accommodate movement of the leaf during imaging.

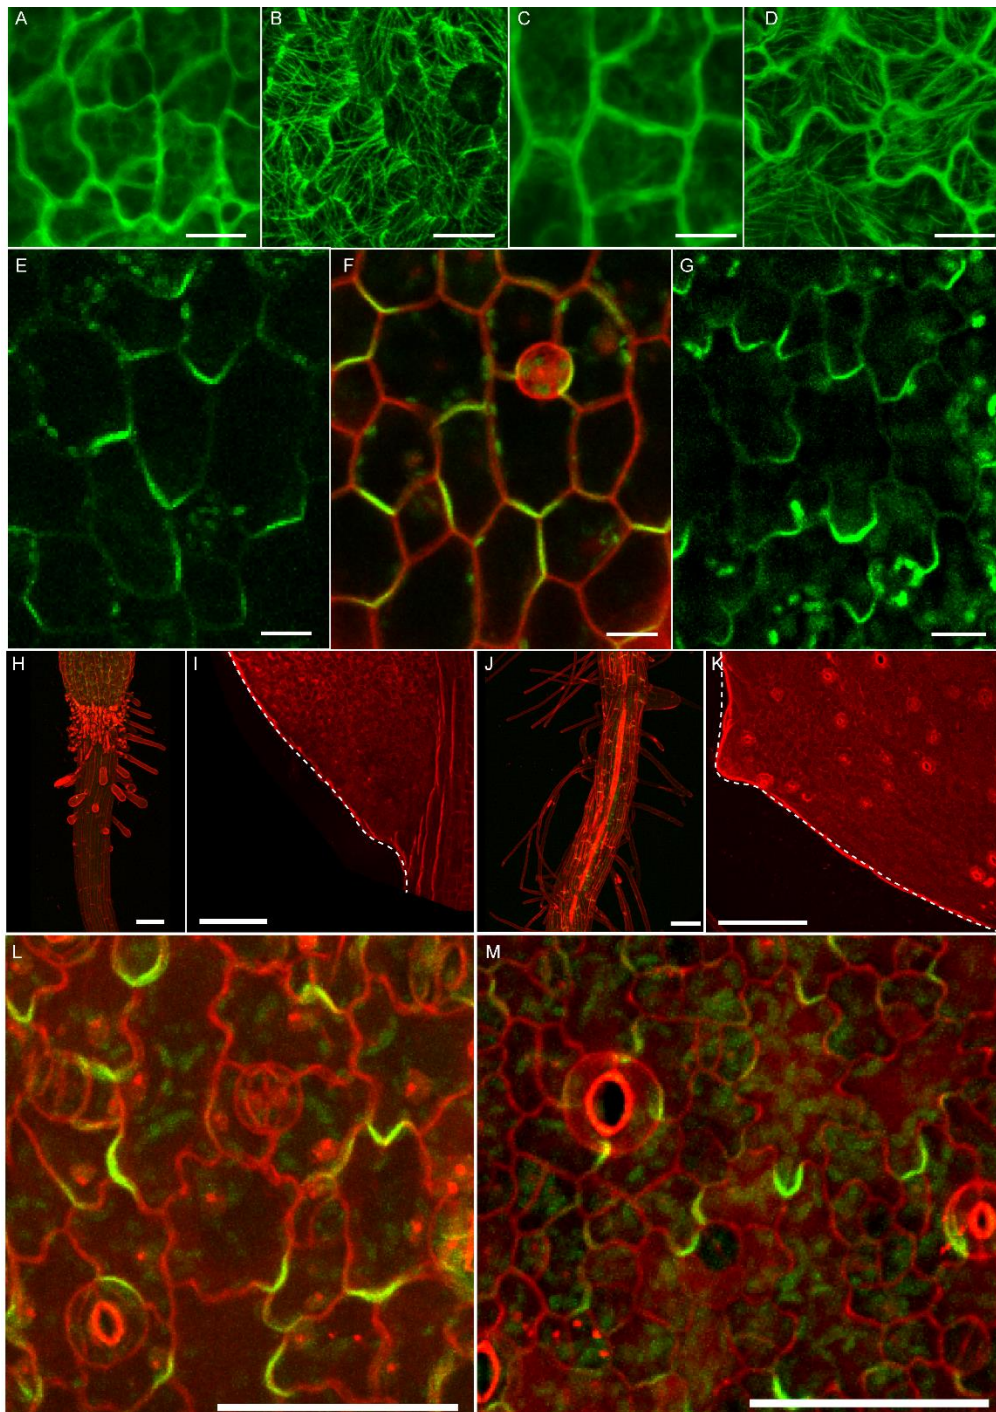

**Figure S3. 35S::GFP-BASL localisation remains proximal in cells treated with oryzalin and NPA. Related to Figure 4.**

(A) 35S::Tubulin-GFP after treatment with 20  $\mu$ M oryzalin for 4 hours showing microtubules depolymerised. (B) 35S::Tubulin-GFP after equivalent treatment to A with DMSO. (C) 35S::Tubulin-GFP after treatment with 20  $\mu$ M oryzalin for 2 days showing microtubules still depolymerised. (D) 35S::Tubulin-GFP after equivalent treatment to C with DMSO. (E, F) Examples of 35S::GFP-BASL induced in leaves treated with 20  $\mu$ M oryzalin for 2 days. BASL signal is proximally localised. Cell wall stained with PI (red) in F. (G) 35S::GFP-BASL proximally localised in leaves treated with DMSO equivalent to E,F. Scale bars 10  $\mu$ m in A-G. (H) Root of NPA (100 $\mu$ M) treated seedlings did not produce lateral roots or fully developed root hairs. (I) Leaf outline of NPA (100 $\mu$ M) treated seedlings did not produce a wild-type serration. (J) Root and (K) leaf outline of DMSO treated seedlings showing lateral roots and root hairs, and serration respectively. Dotted white line indicates leaf outline. Scale bars 100  $\mu$ m in H-K. (L) 35S::GFP-BASL induced in leaves grown on 100  $\mu$ M NPA remained proximal. (M) 35S::GFP-BASL induced in leaves grown on DMSO control. PI staining shows outlines. Scale bars in L-M are 50  $\mu$ m.

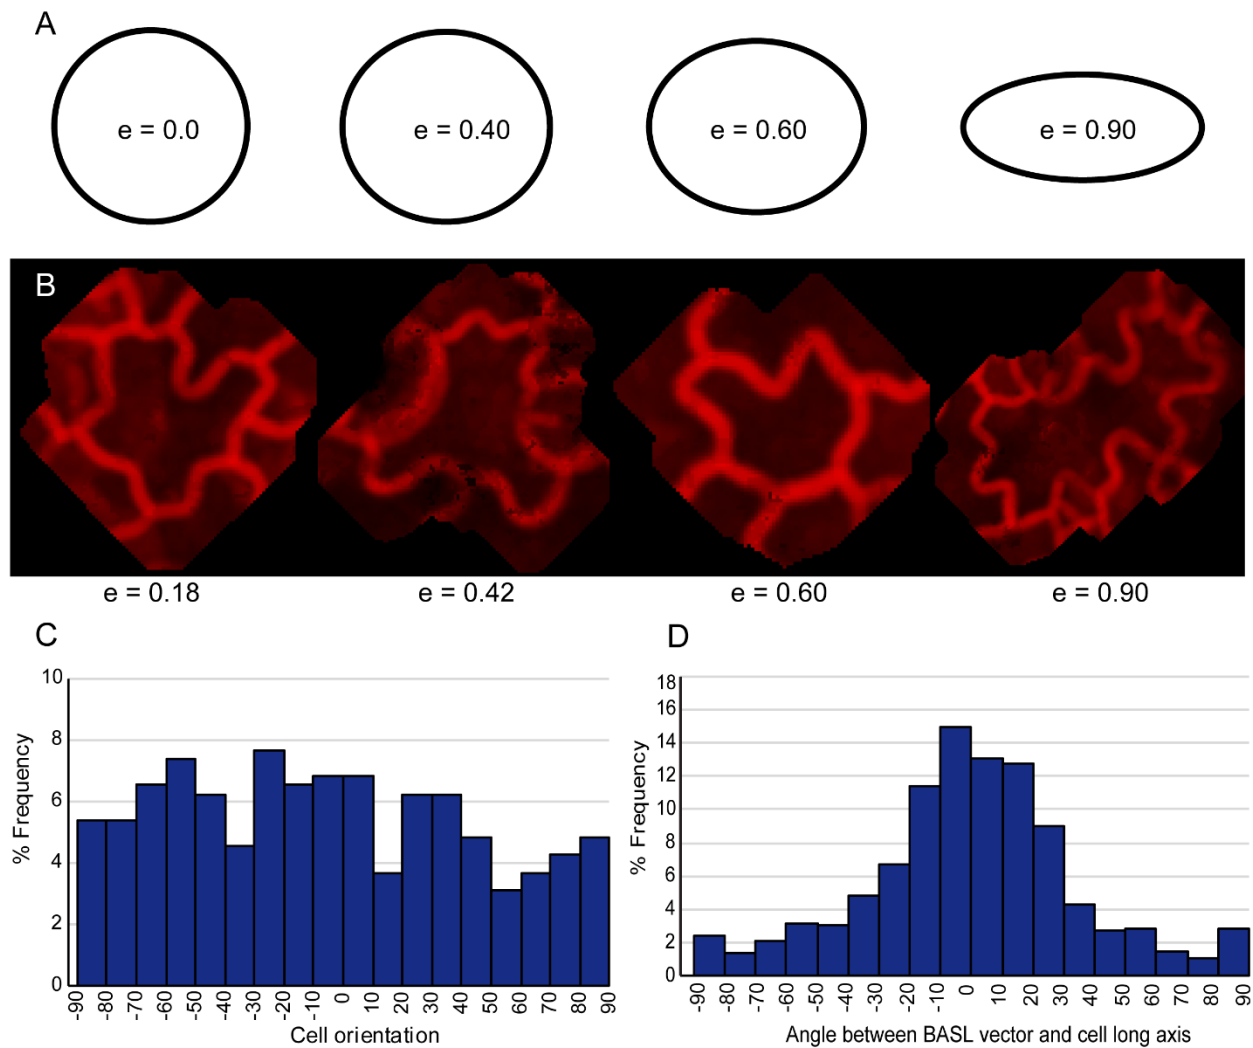

**Figure S4. A cell with eccentricity of less than 0.6 was considered near isotropic. Related to Figure 3.**

(A) Schematic showing ellipse eccentricities. An eccentricity of less than 0.6 was considered to be near isotropic. (B) Examples of cell eccentricities showing cells regarded as near isotropic (except cell on far right with an eccentricity of 0.9). Cell outlines shown in red by RFP-PM. (C) Histogram showing cell long axis orientation relative to the midline vector for near isotropic cells (total from 4 leaves greater than 800  $\mu\text{m}$  in width), showing that this subset of cells has no preferential orientation. (D) Histogram showing frequencies of angle between BASL vector and cell long axis (for leaf shown in Figure 3A), indicating correlation between BASL vector and cell long axis orientation.

| Genotype comparison   | n = BASL vectors inside -80 to 80 range | n = BASL vectors outside -80 to 80 range | n = leaf number                 | Chi-squared (df=1) | P value       |
|-----------------------|-----------------------------------------|------------------------------------------|---------------------------------|--------------------|---------------|
| WT vs <i>spch</i>     | WT = 6025<br><i>spch</i> = 3169         | WT = 1013<br><i>spch</i> = 278           | WT = 33<br><i>spch</i> = 26     | 85                 | $p < 10^{-5}$ |
| WT vs Native          | WT = 6025<br>Native = 888               | WT = 1013<br>Native = 431                | WT = 33<br>Native = 22          | 260                | $p < 10^{-5}$ |
| <i>spch</i> vs Native | <i>spch</i> = 3169<br>Native = 888      | <i>spch</i> = 278<br>Native = 431        | <i>spch</i> = 26<br>Native = 22 | 456                | $p < 10^{-5}$ |

**Table S1. Two-way chi-squared tests for comparing BASL vector orientation across genotypes. Related to Figure 2.**

Chi-squared tests comparing BASL vector orientation across genotypes, based on number of vectors within the range -80° to +80° compared to outside this range. 'WT' refers to inducible 35S::GFP-BASL in a wild-type background, '*spch*' refers to inducible 35S::GFP-BASL in a speechless background, and 'native' refers to BASL::GFP-BASL. Note that as the distributions were not normal we used a non-parametric test.

| Top left | Top middle | Top right | Mid left | Mid middle | Mid right | Bottom left | Bottom middle | Bottom right |
|----------|------------|-----------|----------|------------|-----------|-------------|---------------|--------------|
| -41.1    | 38.9       | -19.3     | -24.1    | 4.5        | 35.3      | -40.5       | -28.0         | 42.8         |
| -45.3    | 8.4        | 19.6      | -57.4    | -3.5       | 64.3      | -60.4       | -4.2          | 66.6         |
| 3.7      | 11.6       | -15.9     | -28.0    | -20.6      | 7.2       | -36.6       | -15.5         | 19.6         |
| -1.1     | 3.5        | -26.6     | -29.3    | -13.2      | 25.0      | -83.0       | 10.5          | 86.9         |

**Table S2. Average vectors from isotropic cells in regions of additional subdivided leaves shown. Related to Figure 3.** The first row of data shows average vectors for regions of leaf shown in Figure 3H, the bottom 3 rows show average vectors for leaves in 3 additional leaves with widths greater than 800  $\mu\text{m}$ .
